# Supplementary material for: Factores de riesgo laboral derivados de la emigración
Source: Royal Society of Chemistry journal article supplement (doi:10.1039/c9cc05984a), 2009-01-01
Supplement: c9cc05984a1.pdf [file c9cc05984a1.pdf]

## Supporting Information

### Two polyoxovanadate-based metal-organic polyhedra with “near-miss Johnson solid” geometry

Yaru Gong,<sup>‡a</sup> Yanli Tao,<sup>‡a</sup> Na Xu,<sup>a</sup> Chunyi Sun,<sup>a</sup> Xinlong Wang<sup>\*a</sup> and Zhongmin Su<sup>\*ab</sup>

<sup>a</sup> Key Laboratory of Polyoxometalate Science of Ministry of Education, Northeast Normal University, Changchun, Jilin, 130024 (China).

<sup>b</sup> Jilin Provincial Science and Technology Innovation Center of Optical Materials and Chemistry, School of Chemistry and Environmental Engineering, Changchun University of Science and Technology, Changchun, Jilin, 130022 (China).

\*Corresponding author. E-mail address: wangxl824@nenu.edu.cn;  
zmsu@nenu.edu.cn.

### Contents

#### 1. Materials and Methods

#### 2. Synthesis and Characterization of VMOP-27 and VMOP-28.

**Table S1.** Crystallographic data for VMOP-27.

**Table S2.** Crystallographic data for VMOP-28.

**Table S3.** BVS results for the vanadium and niobium atoms in  $[\text{NbV}_5\text{O}_6(\mu_3\text{-O})_5(\text{SO}_4)(\text{COO})_5]^{4-}$ .

**Table S4.** BVS results for the vanadium and tungsten atoms in  $[\text{WV}_5\text{O}_6(\mu_3\text{-O})_5(\text{SO}_4)(\text{COO})_5]^{3-}$ .

**Table S5.** The structural analysis of SP-38.

**Table S6.** The geometric parameters of simplified polyhedra which are including faces (F), edges (E), vertices (V), rotation groups and the dihedral angles between different faces. A triangle, a quadrangle, a pentagon are abbreviated as {3}, {4} and {5}.

**Figure S1.** The ball-and-stick representation of the pentanuclear SBB  $[\text{MV}_5\text{O}_6(\mu_3\text{-O})_5(\text{SO}_4)_6]$  and  $[\text{MV}_5\text{O}_6(\mu_3\text{-O})_5(\text{SO}_4)(\text{COO})_5]$ .

**Figure S2.** The packing representation of VMOP-27 and VMOP-28 with view in the direction of the crystallographic *a* axis (a, c) and *c* axis (b, d).

**Figure S3.** The connection mode between *J4* and *J5*: *J5* – *J5*, *J5* – *J4* and *J4* – *J4*.

**Figure S4.** The experimental and simulated powder X-Ray diffraction patterns for  $[\text{NbV}_5\text{O}_{11}(\text{SO}_4)_6]^{9-}$ .

**Figure S5.** The experimental and simulated powder X-Ray diffraction patterns for **VMOP-27** and **VMOP-28**.

**Figure S6.** IR spectra of **VMOP-27** and **VMOP-28**.

**Figure S7.** TGA curves of **VMOP-27** and **VMOP-28**.

**Figure S8.** Temperature dependence of the inverse magnetic susceptibility  $\chi_M^{-1}$  for **VMOP-27** and **VMOP-28** between 2 and 300 K.

## 1. Materials and Methods

All chemical reagents were purchased from commercial sources and used without further purification. PXRD patterns were recorded ranging from  $5^\circ$  to  $50^\circ$  at room temperature on a Siemens D5005 diffractometer with Cu  $K\alpha$  ( $\lambda = 1.5418 \text{ \AA}$ ). Thermogravimetric analysis (TGA) of the samples was performed using a PerkinElmer TG-7 analyzer heated from  $25^\circ\text{C}$  to  $800^\circ\text{C}$  at the heating rate of  $10^\circ\text{C}\cdot\text{min}^{-1}$  under a dry nitrogen flow. Elemental analyses (CHN) were conducted on a PerkinElmer 2400 CHN Elemental analyzer. The FT-IR spectra were measured on an Alpha Centaur FT/IR spectrophotometer in the range  $4000\text{--}400 \text{ cm}^{-1}$  using KBr pellets. Variable temperature magnetic susceptibility data were obtained in the temperature range of  $2\text{--}300 \text{ K}$  using a SQUID magnetometer (Quantum Design, MPMS-5) with an applied field of  $1000 \text{ Oe}$ .

## 2. Synthesis and Characterization

(1) Synthesis of **VMOP-27**:

$\text{VOSO}_4 \cdot x\text{H}_2\text{O}$  (0.03 g),  $\text{NbCl}_5$  (0.01 g) and 1,3,5-Benzenetricarboxylic acid (0.025 g) in 2 ml DMF (*N,N*-Dimethylformamide), 0.3 ml  $\text{CH}_3\text{OH}$  (methanol) and 0.2 mL  $\text{CH}_3\text{CN}$  (acetonitrile) were placed in a Parr Teflon-lined stainless steel vessel heated to  $130^\circ\text{C}$  and held at this temperature for 2 days. After slow cooling to room temperature, green crystals were obtained (washed with  $\text{CH}_3\text{OH}$ ) with a yield of 30% based on  $\text{H}_3\text{BTC}$ . Elemental analysis (%) caclcd: C, 24.10; H, 3.32; N, 5.02. Found: C, 23.79; H, 2.87; N, 4.35. IR (KBr,  $\text{cm}^{-1}$ ): 3444 (br), 3032 (w), 2778 (w), 1617 (s), 1566(s), 1447 (s), 1390 (vs), 1110 (m), 1009 (m), 980 (s), 759 (s), 720 (s), 635 (s), 502 (m).

(2) Synthesis of **VMOP-28**:

VOSO<sub>4</sub>·xH<sub>2</sub>O (0.02 g), Na<sub>2</sub>WO<sub>4</sub> (0.01 g) and 1,3,5-Benzenetricarboxylic acid (0.02 g) in 2 ml DMF (*N,N*-Dimethylformamide), 0.5 ml CH<sub>3</sub>OH (methanol) and a drop of hydrochloric acid were placed in a Parr Teflon-lined stainless steel vessel heated to 130 °C and held at this temperature for 2 days. After slow cooling to room temperature, green crystals were obtained (washed with CH<sub>3</sub>OH) with a yield of 50% based on H<sub>3</sub>BTC. Elemental analysis (%) caclcd: C, 22.41; H, 2.75; N, 4.02. Found: C, 21.58; H, 2.94; N, 4.31. IR (KBr, cm<sup>-1</sup>): 3027(m), 2779(m), 2457(w), 1657(m), 1612(s), 1561(s), 1445(s), 1386(s), 1105(m), 975(m), 800(w), 754(m), 716(m), 632(m), 578(m), 490(m).

Supplement: In the synthesis of **VMOP-27** and **VMOP-28**, we had tried some different vanadium source, such as NaVO<sub>3</sub>, Na<sub>3</sub>VO<sub>4</sub>, NH<sub>4</sub>VO<sub>3</sub>, VCl<sub>3</sub> and V<sub>2</sub>O<sub>5</sub>, but they are not good for the synthesis metal-organic polyhedra.

**Table S1.** Crystallographic data for **VMOP-27**.

|                                 |                                                                                                                                   |
|---------------------------------|-----------------------------------------------------------------------------------------------------------------------------------|
| Empirical formula               | C <sub>168</sub> H <sub>276</sub> Cl <sub>4</sub> N <sub>30</sub> Nb <sub>4</sub> O <sub>180</sub> S <sub>7</sub> V <sub>40</sub> |
| Formula weight                  | 8371.63                                                                                                                           |
| Crystal system                  | Tetragonal                                                                                                                        |
| Space group                     | <i>I</i> -42 <i>m</i>                                                                                                             |
| Temperature                     | 273 (2) K                                                                                                                         |
| Wavelength                      | 0.71073 Å                                                                                                                         |
| Unit-cell dimensions            | a = b = 21.854 (3) Å,<br>c = 44.273 (6) Å<br>α = β = γ = 90°                                                                      |
| Volume                          | 21145 (6) Å <sup>3</sup>                                                                                                          |
| Z                               | 2                                                                                                                                 |
| Density (calculated)            | 1.315 g/cm <sup>3</sup>                                                                                                           |
| Absorption coefficient          | 1.077 mm <sup>-1</sup>                                                                                                            |
| F(000)                          | 8396                                                                                                                              |
| Limiting indices                | -26 ≤ h ≤ 26, -25 ≤ k ≤ 26, -51 ≤ l ≤ 52                                                                                          |
| Theta range for data collection | 2.948 to 25.109 °                                                                                                                 |
| Reflections collected           | 54581                                                                                                                             |
| Independent reflections         | 7098 [R(int) = 0.0957]                                                                                                            |
| Completeness to theta = 25.00°  | 99 %                                                                                                                              |
| Refinement method               | Full-matrix least-squares on F <sup>2</sup>                                                                                       |
| Data / restraints / parameters  | 9693 / 1094 / 487                                                                                                                 |

|                                   |                                   |
|-----------------------------------|-----------------------------------|
| Goodness-of-fit on F <sup>2</sup> | 1.009                             |
| Final R indices [I > 2sigma(I)]   | R1 = 0.0647, wR2 = 0.1754         |
| R indices (all data)              | R1 = 0.0957, wR2 = 0.1979         |
| Largest diff. peak and hole       | 0.761 and -1.994 eA <sup>-3</sup> |

$${}^aR_1 = \frac{\sum ||F_o| - |F_c||}{\sum |F_o|}; {}^b wR_2 = \left\{ \frac{\sum [w(F_o^2 - F_c^2)^2]}{\sum [w(F_o^2)^2]} \right\}^{1/2}$$

**Table S2.** Crystallographic data for **VMOP-28**.

|                                   |                                                                                                                                  |
|-----------------------------------|----------------------------------------------------------------------------------------------------------------------------------|
| Empirical formula                 | C <sub>156</sub> H <sub>228</sub> Cl <sub>4</sub> N <sub>24</sub> O <sub>176</sub> S <sub>6</sub> V <sub>40</sub> W <sub>4</sub> |
| Formula weight                    | 8362.77                                                                                                                          |
| Crystal system                    | Monoclinic                                                                                                                       |
| Space group                       | C2/c                                                                                                                             |
| Temperature                       | 296 (2) K                                                                                                                        |
| Wavelength                        | 0.71073 Å                                                                                                                        |
| Unit-cell dimensions              | a = 41.892 (5) Å, b = 21.947 (2) Å, c = 46.700 (5) Å<br>α = γ = 90 °, β = 103.267 (4) °                                          |
| Volume                            | 41791 (8) Å <sup>3</sup>                                                                                                         |
| Z                                 | 4                                                                                                                                |
| Density (calculated)              | 1.329 g/cm <sup>3</sup>                                                                                                          |
| Absorption coefficient            | 2.072 mm <sup>-1</sup>                                                                                                           |
| F(000)                            | 16480                                                                                                                            |
| Limiting indices                  | -48 ≤ h ≤ 49, -25 ≤ k ≤ 26, -55 ≤ l ≤ 55                                                                                         |
| Theta range for data collection   | 2.176-25.136°                                                                                                                    |
| Reflections collected             | 105495                                                                                                                           |
| Independent reflections           | 26809 [R(int) = 0.0551]                                                                                                          |
| Completeness to theta = 25.00°    | 98.5 %                                                                                                                           |
| Refinement method                 | Full-matrix least-squares on F <sup>2</sup>                                                                                      |
| Data / restraints / parameters    | 36825 / 1638 / 1761                                                                                                              |
| Goodness-of-fit on F <sup>2</sup> | 1.018                                                                                                                            |
| Final R indices [I > 2sigma(I)]   | R1 = 0.0612, wR2 = 0.1640                                                                                                        |
| R indices (all data)              | R1 = 0.0883, wR2 = 0.1853                                                                                                        |
| Largest diff. peak and hole       | 2.571 and -3.366 eA <sup>-3</sup>                                                                                                |

$${}^aR_1 = \frac{\sum ||F_o| - |F_c||}{\sum |F_o|}; {}^b wR_2 = \left\{ \frac{\sum [w(F_o^2 - F_c^2)^2]}{\sum [w(F_o^2)^2]} \right\}^{1/2}$$

**Table S3.** BVS results for the vanadium and niobium atoms in [NbV<sub>5</sub>O<sub>6</sub>(μ<sub>3</sub>-O)<sub>5</sub>(SO<sub>4</sub>)(COO)<sub>5</sub>]<sup>4-</sup>.

| Atom | BVS calc. for V |
|------|-----------------|
| V1   | 3.910           |
| V2   | 4.033           |
| V3   | 3.804           |
| V4   | 3.937           |

|      |                  |
|------|------------------|
| V5   | 4.122            |
| Atom | BVS calc. for Nb |
| Nb   | 5.119            |

**Table S4.** BVS results for the vanadium and tungsten atoms in  $[\text{WV}_5\text{O}_6(\mu_3\text{-O})_5(\text{SO}_4)(\text{COO})_5]^{3-}$ .

|      |                 |
|------|-----------------|
| Atom | BVS calc. for V |
| V1   | 4.267           |
| V2   | 4.243           |
| V3   | 4.087           |
| V4   | 4.117           |
| V5   | 4.091           |
| Atom | BVS calc. for W |
| W    | 6.060           |

**Table S5.** The structural analysis of SP-38.

| Name  | Kinds of SBUs | Vertices |
|-------|---------------|----------|
| SP-38 |               | 4        |

**Table S6.** The geometric parameters of simplified polyhedra which are including faces (F), edges (E), vertices (V), rotation groups and the dihedral angles between different faces. A triangle, a quadrangle, a pentagon are abbreviated as {3}, {4} and {5}.

| Name  | Faces                             | Edges                       | Edge and dihedral angles                                                                                                                                                                                                                                                                                         | Vertices                                      | Group                                 |
|-------|-----------------------------------|-----------------------------|------------------------------------------------------------------------------------------------------------------------------------------------------------------------------------------------------------------------------------------------------------------------------------------------------------------|-----------------------------------------------|---------------------------------------|
| SP-38 | 2•6 {3}<br>2+4•3+4+4 {4}<br>4 {5} | 12•3 <3•4><br><br>4•4 <4•4> | 172°14'35"/172°45'04"/1<br>66°27'14"/167°3'54"/151°<br>47'56"/154°28'30"/154°1<br>4'28"/150°35'20"/150°34'<br>23"/143°4'34"/148°45'58"<br>/149°54"/141°32"/149°28'<br>37"/140°51'29"/137°44'3<br>8"/139°41'06"/137°23'28"<br><br>141°5'10"/141°41'42"/13<br>3°20'46"/138°56'53"/139°<br>49'23"/133°30'32"/129°1' | 4•4 (3•4 <sup>3</sup> )<br>4+8•2<br>(3•4•5•4) | [2, 4] <sup>+</sup><br>D <sub>2</sub> |

|  |  |           |                                                                                                                                              |  |  |
|--|--|-----------|----------------------------------------------------------------------------------------------------------------------------------------------|--|--|
|  |  |           | 26"/129°28'12"                                                                                                                               |  |  |
|  |  | 4•5 <4•5> | 158°18'29"/156°34'48"/1<br>50°20'49"/156°35'53"/14<br>4°53'49"/148°54'07"/144°<br>23'24"/130°31'19"/135°2<br>6'02"/132°56'46"/136°22'<br>30" |  |  |

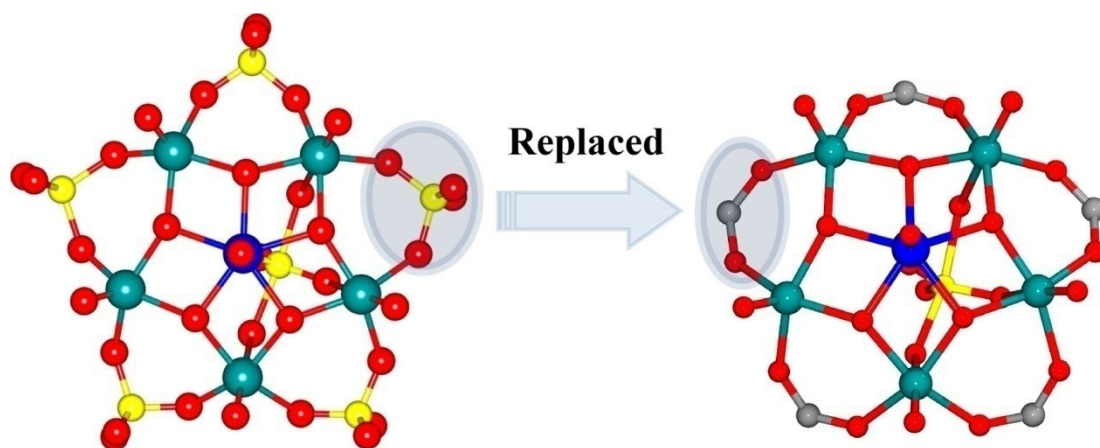

**Figure S1.** The ball-and-stick representation of the pentanuclear SBB  $[MV_5O_6(\mu_3-O)_5(SO_4)_6]$  and  $[MV_5O_6(\mu_3-O)_5(SO_4)(COO)_5]$ .

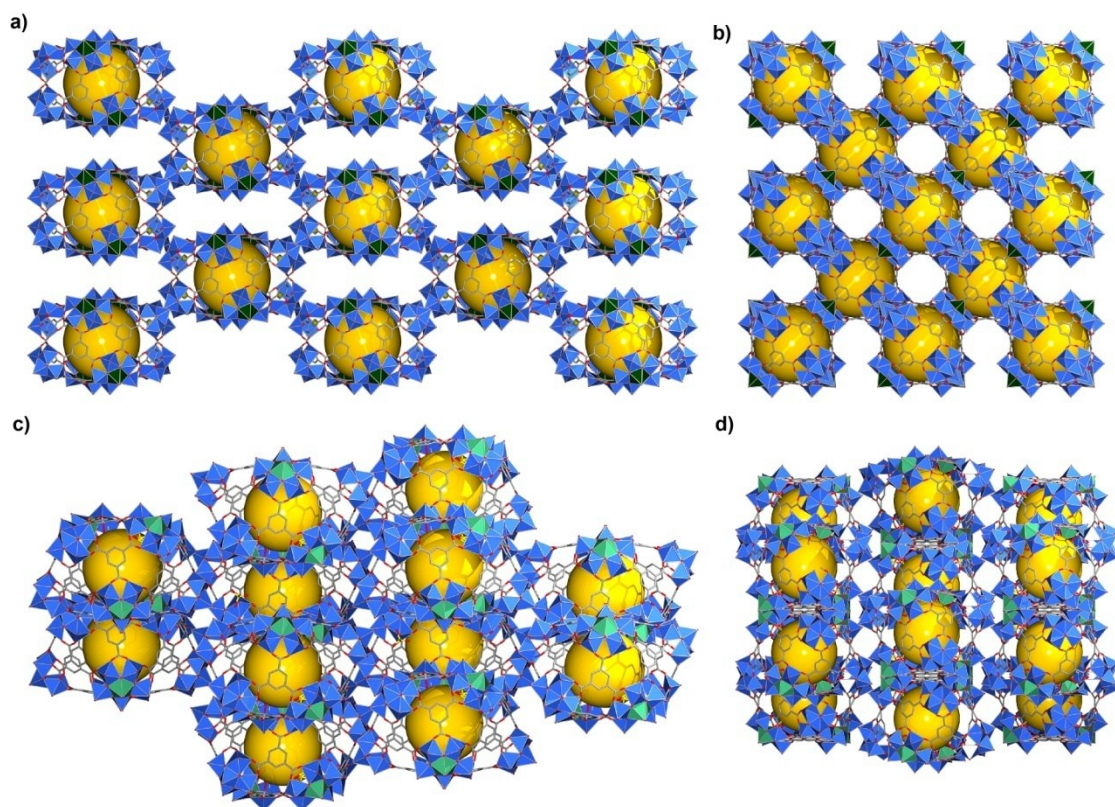

**Figure S2.** The packing representation of **VMOP-27** and **VMOP-28** with view in the direction of the crystallographic *a* axis (a, c) and *c* axis (b, d).

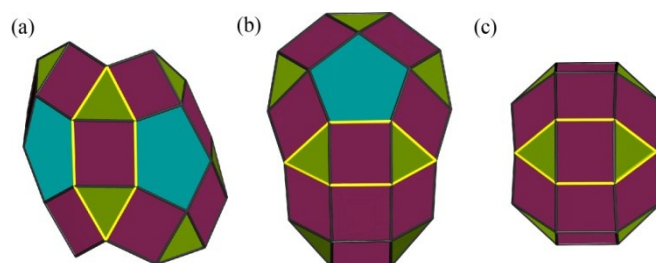

**Figure S3.** The connection mode between *J4* and *J5*: *J5* – *J5*, *J5* – *J4* and *J4* – *J4*.

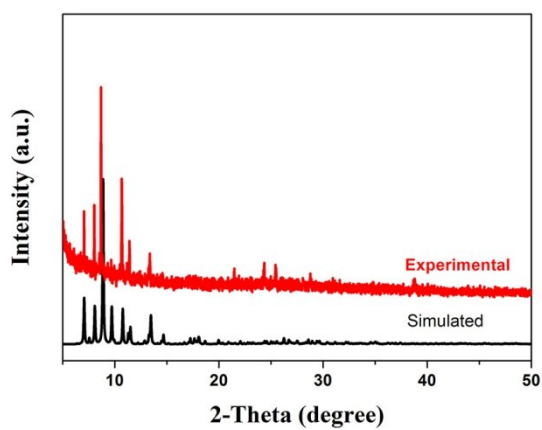

**Figure S4.** The experimental and simulated powder X-Ray diffraction patterns for  $[\text{NbV}_5\text{O}_{11}(\text{SO}_4)_6]^{9-}$ .

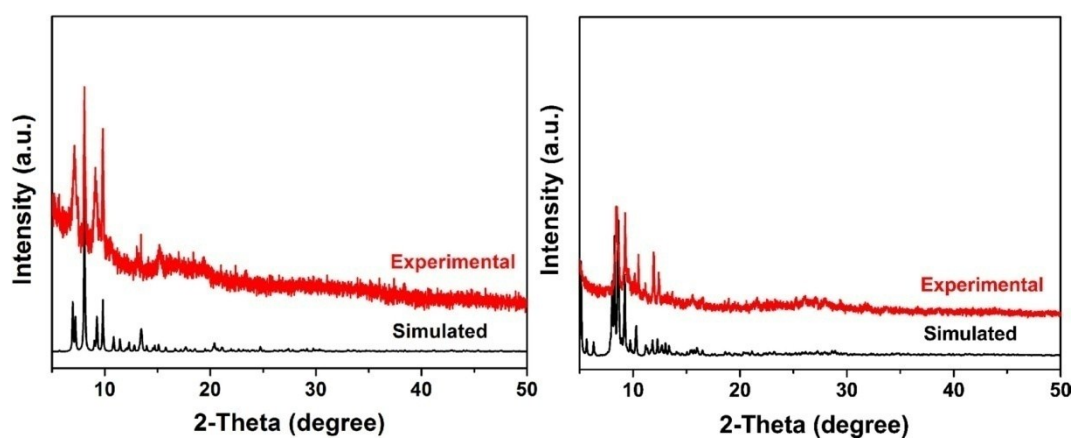

**Figure S5.** Experimental and simulated powder X-Ray diffraction patterns for VMOP-27 and VMOP-28.

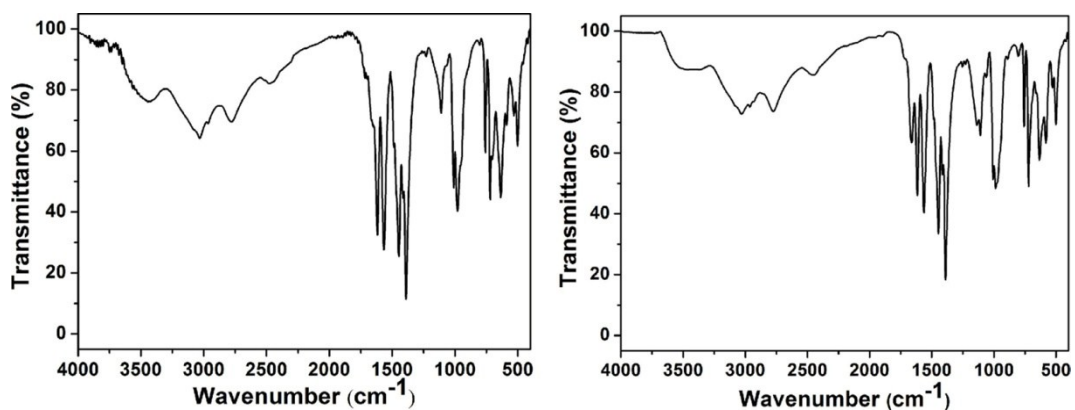

**Figure S6.** IR spectrum of VMOP-27 and VMOP-28.

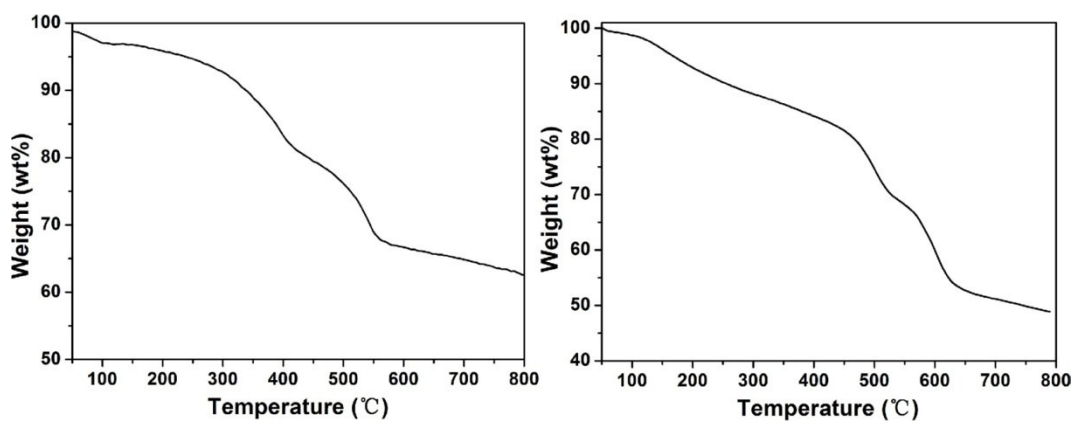

**Figure S7.** TGA curve of VMOP-27 and VMOP-28.



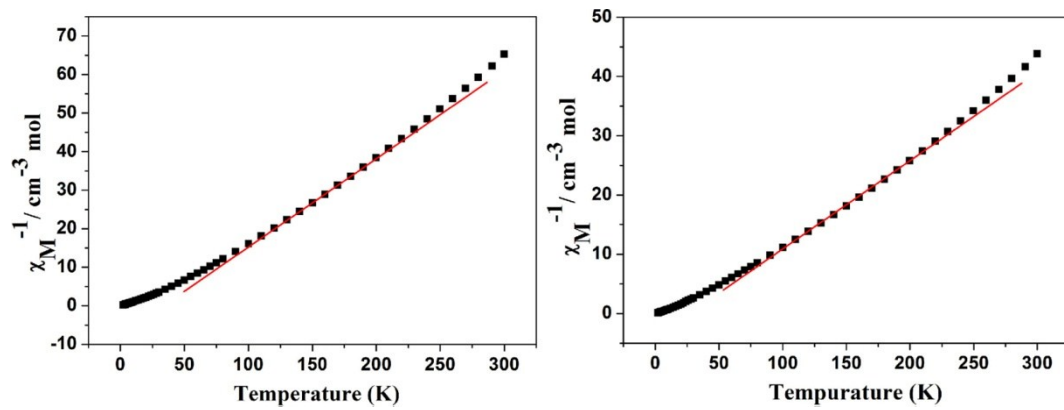

**Figure S8.** The temperature dependence of the inverse magnetic susceptibility  $\chi_M^{-1}$  for VMOP-27 between 2 and 300 K.
